# Supplementary material
Source: PubMed Central journal article supplement (PMC7480551)

## Supplemental Material

|                                                                                                                                                                    |   |
|--------------------------------------------------------------------------------------------------------------------------------------------------------------------|---|
| Supplemental Table 1. Demographic, Clinical, and Procedural Characteristics of the PRESERVE Trial and Sub-Study .....                                              | 2 |
| Supplemental Table 2. Unadjusted Urine Biomarker Concentrations According to Development of Contrast Associated-Acute Kidney Injury .....                          | 3 |
| Supplemental Table 3. Unadjusted Urine Biomarker Concentrations According to Development of Major Adverse Kidney Events or Death .....                             | 4 |
| Supplemental Figure 1. Study Flow Chart.....                                                                                                                       | 5 |
| Supplemental Figure 2. Median [IQR] Relative Ratios of Plasma Biomarkers by CA-AKI Status and Plasma Biomarkers from the Marathon Study and TRIBE-AKI Cohort. .... | 6 |

**Supplemental Table 1. Demographic, Clinical, and Procedural Characteristics of the PRESERVE Trial<sup>a</sup> and Sub-Study<sup>b</sup>**

|                                                           | Sub-Study Participants<br>(n=922) | Overall PRESERVE<br>Participants<br>(n=4993) |
|-----------------------------------------------------------|-----------------------------------|----------------------------------------------|
| <b>Demographic</b>                                        |                                   |                                              |
| Age-years, mean ± sd                                      | 70 ± 8                            | 70 ± 8                                       |
| Male sex, no. (%)                                         | 896 (97%)                         | 4671 (94%)                                   |
| Race/Ethnicity, no. (%)                                   |                                   |                                              |
| White                                                     | 718 (78%)                         | 3893 (78%)                                   |
| Black                                                     | 144 (16%)                         | 570 (11%)                                    |
| Other                                                     | 26 (3%)                           | 349 (7%)                                     |
| Hispanic                                                  | 32 (3%)                           | 181 (4%)                                     |
| <b>Clinical</b>                                           |                                   |                                              |
| Weight –kg, mean ± sd                                     | 100 ± 22                          | 98 ± 22                                      |
| Median baseline serum creatinine (IQR) -mg/dL             | 1.5 (1.3-1.7)                     | 1.5 (1.3-1.8)                                |
| UACR Categories, no. (%)                                  |                                   |                                              |
| <30                                                       | 371 (43%)                         | 1723/4515(38%)                               |
| 30-300                                                    | 286 (33%)                         | 1637/4515 (36%)                              |
| >300                                                      | 205 (24%)                         | 1155/4515 (26%)                              |
| Median baseline eGFR (IQR), mL/min                        | 48 (40-57)                        | 50 (41-59)                                   |
| Diabetes, no. (%)                                         | 760 (82%)                         | 4041 (81%)                                   |
| <b>Procedural</b>                                         |                                   |                                              |
| Coronary Procedure, no. (%)                               | 812 (88%)                         | 4466/4937 (90%)                              |
| Percutaneous Intervention, no. (%)                        | 255 (28%)                         | 1406/4837 (29%)                              |
| Left ventricular end diastolic pressure - mmHg, mean ± sd | 19 ± 8                            | 18 ± 8                                       |
| Trial arm, no. (%)                                        |                                   |                                              |
| Saline + Placebo                                          | 211 (23%)                         | 1244 (25%)                                   |
| Saline + Acetylcysteine                                   | 236 (26%)                         | 1238 (25%)                                   |
| Sodium Bicarbonate + Placebo                              | 242 (26%)                         | 1254 (25%)                                   |
| Sodium Bicarbonate + Acetylcysteine                       | 233 (25%)                         | 1257 (25%)                                   |
| <b>PRESERVE Trial Outcomes</b>                            |                                   |                                              |
| CA-AKI                                                    | 73 (8%)                           | 445 (9%)                                     |
| MAKE-D                                                    | 60 (7%)                           | 226 (5%)                                     |

Abbreviations: CA-AKI, contrast associated acute kidney injury; eGFR, estimated glomerular filtration rate; IQR, interquartile range; MAKE-D, major adverse kidney events or death; UACR, urine albumin to creatinine ratio.

<sup>a</sup> Weisbord SD, Gallagher M, Jneid H, et al. Outcomes after Angiography with Sodium Bicarbonate and Acetylcysteine. *N Engl J Med.* 2018;378(7):603-614.

<sup>b</sup> Parikh CR, Liu C, Mor MK, et al. Kidney Biomarkers of Injury and Repair as Predictors of Contrast-Associated AKI: A Substudy of the PRESERVE Trial. *Am J Kidney Dis.* September 2019. doi:10.1053/j.ajkd.2019.06.011

**Supplemental Table 2. Unadjusted Urine Biomarker Concentrations According to Development of Contrast Associated-Acute Kidney Injury**

|                  | Median (IQR) Raw Urine Biomarker, pg/mL |                    |                   |                    |                               |
|------------------|-----------------------------------------|--------------------|-------------------|--------------------|-------------------------------|
|                  | Biomarker                               | CA-AKI             | No CA-AKI         | Unadjusted P-value | Adjusted <sup>a</sup> P-value |
| Pre-Angiography  | KIM-1                                   | 1460 (767, 2633)   | 1419 (731, 2805)  | 0.91               | 0.99                          |
|                  | NGAL                                    | 20 (9, 41)         | 24 (12, 51)       | 0.35               | 0.29                          |
|                  | IL-18                                   | 22 (10, 38)        | 21 (12, 38)       | 0.83               | 0.93                          |
|                  | MCP-1                                   | 183 (115, 302)     | 210 (119, 374)    | 0.33               | 0.44                          |
|                  | UMOD                                    | 2776 (1683, 4606)  | 2453 (1548, 3862) | 0.23               | 0.34                          |
|                  | YKL-40                                  | 400 (137, 1202)    | 406 (137, 1255)   | 0.91               | 0.67                          |
| Post-Angiography | KIM-1                                   | 864 (461, 1597)    | 779 (353, 1474)   | 0.28               | 0.17                          |
|                  | NGAL                                    | 18 (8, 33)         | 16 (8, 39)        | 0.85               | 0.82                          |
|                  | IL-18                                   | 13 (9, 25)         | 14 (8, 23)        | 0.97               | 0.76                          |
|                  | MCP-1                                   | 114 (73, 208)      | 127 (73, 237)     | 0.66               | 0.85                          |
|                  | UMOD                                    | 1862 (1142, 2566)  | 1591 (1066, 2368) | 0.19               | 0.23                          |
|                  | YKL-40                                  | 456 (244, 1467)    | 502(241, 1170)    | 0.92               | 0.92                          |
| Absolute Change  | KIM-1                                   | -579 (-1458, -250) | -574 (-1605,-52)  | 0.71               | 0.75                          |
|                  | NGAL                                    | -4 (-20, 3)        | -5 (-19, 2)       | 0.92               | 0.86                          |
|                  | IL-18                                   | -4 (-22, 1)        | -7 (-18, 1)       | 0.97               | 0.91                          |
|                  | MCP-1                                   | -72 (-141, -20)    | -76 (-180, -6)    | 0.67               | 0.62                          |
|                  | UMOD                                    | -1176 (-2586, -63) | -709 (-1992, 15)  | 0.42               | 0.45                          |
|                  | YKL-40                                  | 55 (-245, 215)     | 56 (-223, 315)    | 0.75               | 0.77                          |
| Relative Ratio   | KIM-1                                   | 0.57 (0.35, 0.81)  | 0.53 (0.29, 0.93) | 0.81               | 0.68                          |
|                  | NGAL                                    | 0.70 (0.50, 1.52)  | 0.72 (0.42, 1.15) | 0.43               | 0.45                          |
|                  | IL-18                                   | 0.73 (0.42, 1.09)  | 0.67 (0.39, 1.06) | 0.65               | 0.67                          |
|                  | MCP-1                                   | 0.61 (0.43, 0.86)  | 0.61 (0.37, 0.96) | 0.97               | 0.80                          |
|                  | UMOD                                    | 0.57 (0.38, 0.98)  | 0.67 (0.39, 1.01) | 0.72               | 0.69                          |
|                  | YKL-40                                  | 1.27 (0.83, 2.58)  | 1.17 (0.62, 2.72) | 0.65               | 0.57                          |

**Supplemental Table 3. Unadjusted Urine Biomarker Concentrations According to Development of Major Adverse Kidney Events or Death**

|                  |           | Median (IQR) Raw Urine Biomarker, pg/mL |                   |                    |                               |
|------------------|-----------|-----------------------------------------|-------------------|--------------------|-------------------------------|
|                  | Biomarker | MAKE-D                                  | No MAKE-D         | Unadjusted P-value | Adjusted <sup>a</sup> P-value |
| Pre-Angiography  | KIM-1     | 1804 (961, 3558)                        | 1392 (720, 2743)  | 0.06               | 0.19                          |
|                  | NGAL      | 37 (16, 97)                             | 23 (11, 49)       | <b>0.009</b>       | 0.09                          |
|                  | IL-18     | 33 (16, 54)                             | 21 (12, 37)       | <b>0.003</b>       | <b>0.01</b>                   |
|                  | MCP-1     | 289 (159, 565)                          | 205 (118, 363)    | <b>0.01</b>        | 0.13                          |
|                  | UMOD      | 2300 (1462, 3642)                       | 2484 (1554, 3944) | 0.47               | 0.86                          |
|                  | YKL-40    | 902 (272, 4474)                         | 394 (127, 1184)   | <b>&lt;0.001</b>   | <b>0.02</b>                   |
| Post-Angiography | KIM-1     | 1169 (412, 2394)                        | 770 (360, 1419)   | <b>0.007</b>       | 0.09                          |
|                  | NGAL      | 21 (13, 60)                             | 16 (8, 38)        | <b>0.04</b>        | 0.27                          |
|                  | IL-18     | 19 (12, 38)                             | 14 (8, 22)        | <b>0.002</b>       | <b>0.01</b>                   |
|                  | MCP-1     | 166 (100, 337)                          | 123 (72, 232)     | <b>0.01</b>        | 0.15                          |
|                  | UMOD      | 1382 (868, 2311)                        | 1621 (1083, 2396) | 0.15               | 0.68                          |
|                  | YKL-40    | 962 (490, 3640)                         | 472 (236, 1091)   | <b>&lt;0.001</b>   | <b>0.03</b>                   |
| Absolute Change  | KIM-1     | -656 (-1854, -58)                       | -574 (-1530, -76) | 0.86               | 0.74                          |
|                  | NGAL      | -14 (-51, -3)                           | -5 (-18, 2)       | <b>0.003</b>       | <b>0.02</b>                   |
|                  | IL-18     | -6 (-30, 0)                             | -6 (-18, 1)       | 0.55               | 0.95                          |
|                  | MCP-1     | -114 (-246, -53)                        | -72 (-174, -6)    | 0.08               | 0.31                          |
|                  | UMOD      | -786 (-1598, -58)                       | -724 (-2118, 17)  | 0.83               | 0.98                          |
|                  | YKL-40    | -61 (-1645, 482)                        | 58 (-197, 305)    | 0.15               | 0.27                          |
| Relative Ratio   | KIM-1     | 0.64 (0.33, 0.94)                       | 0.53 (0.29, 0.91) | 0.42               | 0.62                          |
|                  | NGAL      | 0.59 (0.49, 0.83)                       | 0.74 (0.43, 1.17) | 0.24               | 0.18                          |
|                  | IL-18     | 0.76 (0.36, 1.03)                       | 0.67 (0.40, 1.06) | 0.92               | 0.68                          |
|                  | MCP-1     | 0.55 (0.41, 0.81)                       | 0.62 (0.38, 0.96) | 0.96               | 0.84                          |
|                  | UMOD      | 0.61 (0.36, 0.96)                       | 0.67 (0.39, 1.01) | 0.56               | 0.55                          |
|                  | YKL-40    | 0.94 (0.47, 2.24)                       | 1.19 (0.65, 2.77) | 0.14               | 0.11                          |

Abbreviations: IQR, interquartile range; MAKE-D, major adverse kidney events or death.

<sup>a</sup>Adjusted for baseline eGFR and urine albumin to creatinine ratio

## Supplemental Figure 1. Study Flow Chart

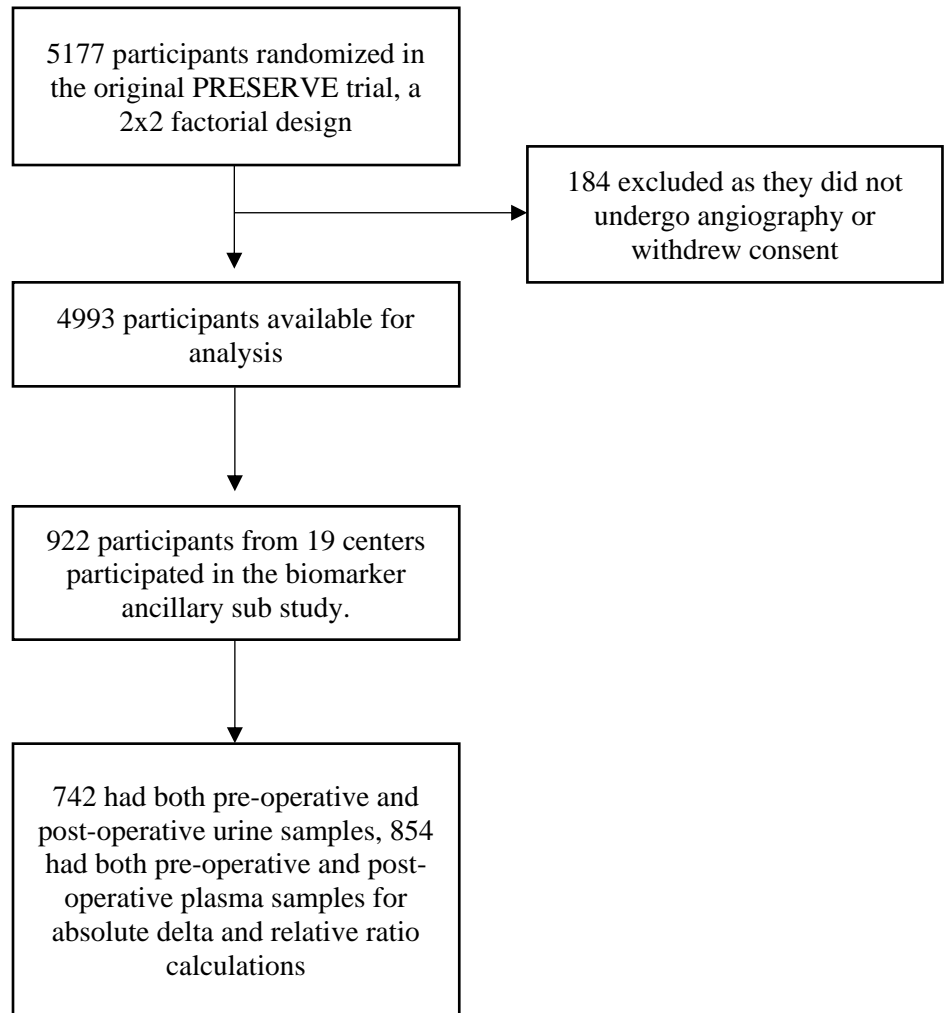

**Supplemental Figure 2. Median [IQR] Relative Ratios of Plasma Biomarkers by CA-AKI Status and Plasma Biomarkers from the Marathon Study and TRIBE-AKI Cohort.**

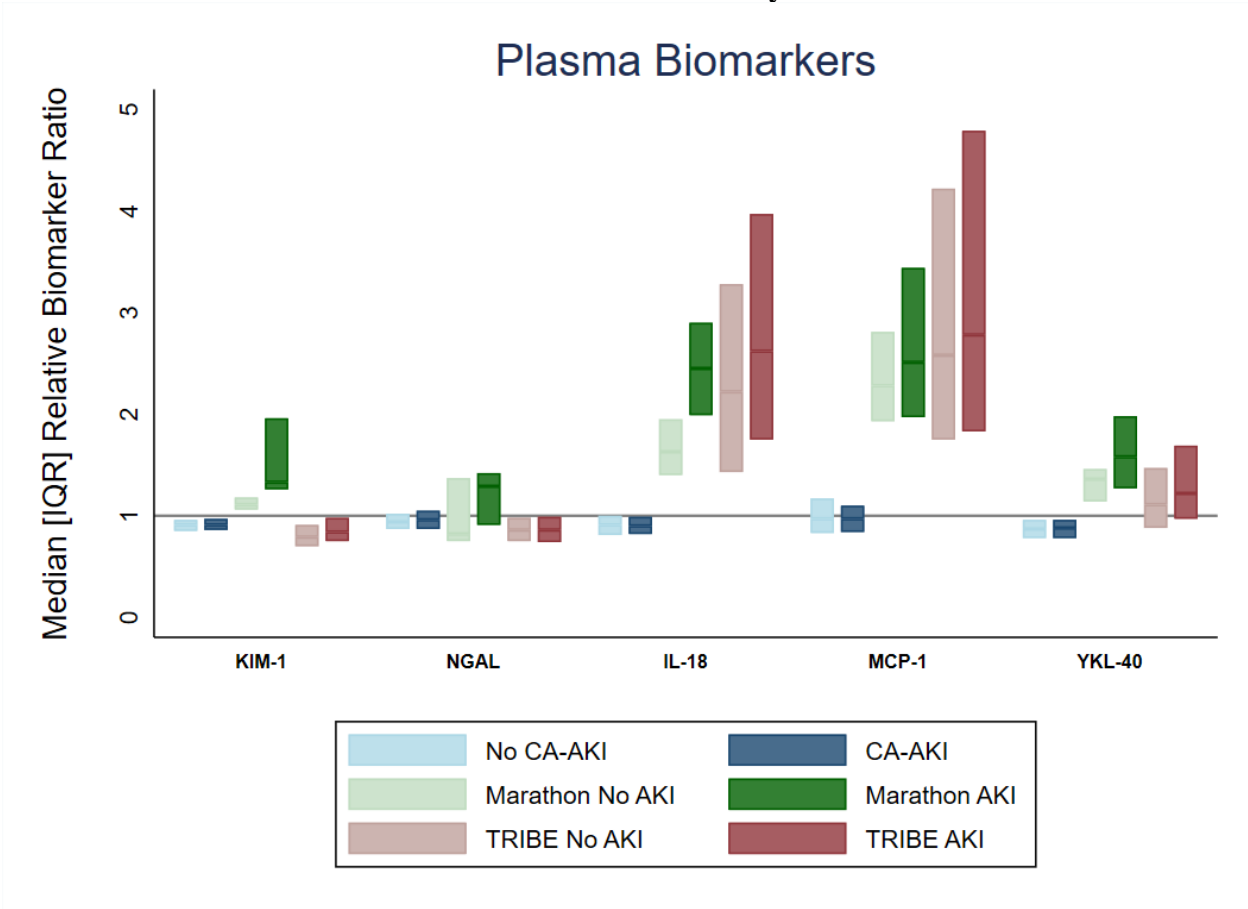

Supplement: CJN.15931219SupplementaryData.pdf [file CJN.15931219SupplementaryData.pdf]
